# Supplementary material
Source: HighWire-hosted journal article supplement (https://jnnp.bmj.com/content/90/9/1051)
Supplement: inline-supplementary-material-2 [file inline-supplementary-material-2.pdf]

**Systematic review and meta-analysis: MBIs in MS**

Data Extraction Sheet v.1 Simpson et al. 2018

| <b>Bibliographic details</b>                     |                                           |
|--------------------------------------------------|-------------------------------------------|
| <b>Authors</b>                                   |                                           |
| <b>Year</b>                                      |                                           |
| <b>Country</b>                                   |                                           |
| <b>Citation</b>                                  |                                           |
| <b>Title (identifying study as an RCT y/n?)</b>  |                                           |
| <b>Structured abstract</b>                       |                                           |
| <b>References identified from reference list</b> | Yes/no<br>If yes, please provide details: |

| <b>Study</b>                                 |  |
|----------------------------------------------|--|
| <b>Study aims and objectives</b>             |  |
| <b>Study design</b>                          |  |
| <b>Comparator group</b>                      |  |
| <b>Statistical methods</b>                   |  |
| <b>Power calculation</b>                     |  |
| <b>Inclusion criteria</b>                    |  |
| <b>Exclusion criteria</b>                    |  |
| <b>Stopping criteria</b>                     |  |
| <b>Setting/location where data collected</b> |  |
| <b>Trial protocol/ registration</b>          |  |
| <b>Ethical approval</b>                      |  |
| <b>Funding details y/n?</b>                  |  |

| <b>Population</b>                                |                           |                                  |
|--------------------------------------------------|---------------------------|----------------------------------|
|                                                  | <b>Intervention group</b> | <b>Control /comparison group</b> |
| <b>Sample size</b>                               |                           |                                  |
| <b>Recruited from where?</b>                     |                           |                                  |
| <b>Age</b>                                       |                           |                                  |
| <b>Sex</b>                                       |                           |                                  |
| <b>Socioeconomic status</b>                      |                           |                                  |
| <b>Ethnicity</b>                                 |                           |                                  |
| <b>Marital status</b>                            |                           |                                  |
| <b>Living Arrangements</b>                       |                           |                                  |
| <b>Educational status</b>                        |                           |                                  |
| <b>Employment status</b>                         |                           |                                  |
| <b>Disease phenotype</b>                         |                           |                                  |
| <b>Use of disease modifying drugs</b>            |                           |                                  |
| <b>Time since diagnosis</b>                      |                           |                                  |
| <b>Disability level</b>                          |                           |                                  |
| <b>Cognitive impairment</b>                      |                           |                                  |
| <b>Comorbid anxiety (% on drug treatment)</b>    |                           |                                  |
| <b>Comorbid depression (% on drug treatment)</b> |                           |                                  |
| <b>Other comorbidities</b>                       |                           |                                  |

| <b>Intervention</b>                                    |  |
|--------------------------------------------------------|--|
| <b>Definition</b>                                      |  |
| <b>Course content</b>                                  |  |
| <b>Tailored to population? (if yes, describe)</b>      |  |
| <b>Fidelity to treatment assessed y/n (if so, how)</b> |  |
| <b>Course completion criteria</b>                      |  |
| <b>Mode of delivery (face-to-face, internet etc)</b>   |  |
| <b>Duration &amp; frequency</b>                        |  |
| <b>Instructor characteristics</b>                      |  |
| <b>No. of participants per group</b>                   |  |
| <b>Intervention materials</b>                          |  |
| <b>Intervention location</b>                           |  |
| <b>Cost to participants</b>                            |  |
| <b>Cost effectiveness</b>                              |  |
| <b>Transport issues</b>                                |  |
| <b>Family/carer involvement</b>                        |  |
| <b>Other (specify)</b>                                 |  |
| <b>Intervention for control group</b>                  |  |

**Provide details:**



| <b>Outcomes</b>                                                                                                                                                                                                                                                                                                                                      |                           |                                  |
|------------------------------------------------------------------------------------------------------------------------------------------------------------------------------------------------------------------------------------------------------------------------------------------------------------------------------------------------------|---------------------------|----------------------------------|
|                                                                                                                                                                                                                                                                                                                                                      | <b>Intervention group</b> | <b>Control /comparison group</b> |
| <b>Feasibility outcomes</b> <ul style="list-style-type: none"> <li>• Recruitment (to pre-defined target y/n?)</li> <li>• Randomisation</li> <li>• Retention</li> <li>• Adherence (classes attendance/ home-practice completion)</li> <li>• Follow-up (when?)</li> <li>• Reasons accounting for attrition reported</li> <li>• Missing data</li> </ul> |                           |                                  |
| <b>CONSORT flow diagram y/n</b>                                                                                                                                                                                                                                                                                                                      |                           |                                  |
| <b>Adverse events reported y/n? (specify)</b>                                                                                                                                                                                                                                                                                                        |                           |                                  |
| <b>Standardised outcomes measures (specify)</b>                                                                                                                                                                                                                                                                                                      |                           |                                  |
| <b>Study-specific outcomes measures (provide details)</b>                                                                                                                                                                                                                                                                                            |                           |                                  |
| <b>Sub-group analyses</b>                                                                                                                                                                                                                                                                                                                            |                           |                                  |
| <b>Other outcomes measured (provide details)</b>                                                                                                                                                                                                                                                                                                     |                           |                                  |
| <b>No. of data collection time points</b>                                                                                                                                                                                                                                                                                                            |                           |                                  |

| <b>Limitations/conclusions/comments</b> |  |
|-----------------------------------------|--|
| <b>Limitations noted by the authors</b> |  |
| <b>Authors' conclusions</b>             |  |
| <b>Reviewer's comments</b>              |  |

| <b>Risk of bias assessment (High/unclear/low)</b>                                  |  |
|------------------------------------------------------------------------------------|--|
| <b>Random sequence generation</b> (selection bias)                                 |  |
| <b>Allocation concealment</b> (selection bias)                                     |  |
| <b>Blinding of assessors</b> (performance bias)                                    |  |
| <b>Blinding of outcome assessment</b> (detection bias) (patient reported outcomes) |  |
| <b>Incomplete outcome data addressed</b> (attrition bias)                          |  |
| <b>Selective outcome reporting</b> (reporting bias)                                |  |
| <b>Other sources of bias</b> (i.e. baseline bias)                                  |  |
