# Supplementary material
Source: HighWire-hosted journal article supplement (https://jnnp.bmj.com/content/90/9/1051)
Supplement: inline-supplementary-material-3 [file inline-supplementary-material-3.pdf]

## Supplementary file 3 – TIDieR checklist items

| Study/<br>checklist item                                        | Mills & Allen<br>2000                                                                                   | Grossman<br>et al. 2010                                                                                                                                                         | Bogosian et<br>al. 2015                                                                                                                                                                                                             | Kolahkaj &<br>Zargar 2015                                                                                                                                                       | Amiri et al.<br>2016                                                                                                                                                                                                                | Mahdavi et<br>al. 2016                                                                                                                                                                                                              | Nejati et<br>al. 2016                                                                                                                                                  | Bahrani et al.<br>2017                                                                                                                                                                                                        | Simpson et<br>al. 2017                                                                                                                                                          | Carletto et al.<br>2017                                                                                                                                                                       | Cavalera et<br>al. 2017                                                                                                                                                         | Senders et<br>al. 2018                                                                                                                                                          |
|-----------------------------------------------------------------|---------------------------------------------------------------------------------------------------------|---------------------------------------------------------------------------------------------------------------------------------------------------------------------------------|-------------------------------------------------------------------------------------------------------------------------------------------------------------------------------------------------------------------------------------|---------------------------------------------------------------------------------------------------------------------------------------------------------------------------------|-------------------------------------------------------------------------------------------------------------------------------------------------------------------------------------------------------------------------------------|-------------------------------------------------------------------------------------------------------------------------------------------------------------------------------------------------------------------------------------|------------------------------------------------------------------------------------------------------------------------------------------------------------------------|-------------------------------------------------------------------------------------------------------------------------------------------------------------------------------------------------------------------------------|---------------------------------------------------------------------------------------------------------------------------------------------------------------------------------|-----------------------------------------------------------------------------------------------------------------------------------------------------------------------------------------------|---------------------------------------------------------------------------------------------------------------------------------------------------------------------------------|---------------------------------------------------------------------------------------------------------------------------------------------------------------------------------|
| <b>1. Brief name</b>                                            | Mindfulness<br>of Movement                                                                              | MBSR                                                                                                                                                                            | MBCT                                                                                                                                                                                                                                | MBSR                                                                                                                                                                            | MBCT                                                                                                                                                                                                                                | MBCT                                                                                                                                                                                                                                | MBSR and<br>Conscious<br>Yoga                                                                                                                                          | MiCBT                                                                                                                                                                                                                         | MBSR                                                                                                                                                                            | Modified<br>MBSR - Body<br>Affective<br>Mindfulness                                                                                                                                           | MBSR                                                                                                                                                                            | MBSR                                                                                                                                                                            |
| <b>2. Why?<br/>(rationale/<br/>theory/ goal)</b>                | Develop<br>moment to<br>moment<br>awareness of<br>breath,<br>posture,<br>movement<br>with<br>compassion | Cultivate<br>interested,<br>accepting,<br>non-<br>judgmental<br>attitude to<br>experience,<br>including<br>difficult<br>sensations,<br>emotions,<br>thoughts<br>and<br>behavior | Adaptation<br>of MBSR.<br>Focus on<br>negative<br>thinking,<br>engaging low<br>mood,<br>changing<br>relationship<br>with<br>thoughts,<br>feelings,<br>sensations,<br>no longer<br>avoiding/<br>reacting to<br>them<br>automatically | Cultivate<br>interested,<br>accepting,<br>non-<br>judgmental<br>attitude to<br>experience,<br>including<br>difficult<br>sensations,<br>emotions,<br>thoughts<br>and<br>behavior | Adaptation<br>of MBSR.<br>Focus on<br>negative<br>thinking,<br>engaging low<br>mood,<br>changing<br>relationship<br>with<br>thoughts,<br>feelings,<br>sensations,<br>no longer<br>avoiding/<br>reacting to<br>them<br>automatically | Adaptation<br>of MBSR.<br>Focus on<br>negative<br>thinking,<br>engaging low<br>mood,<br>changing<br>relationship<br>with<br>thoughts,<br>feelings,<br>sensations,<br>no longer<br>avoiding/<br>reacting to<br>them<br>automatically | Facilitate<br>the<br>compliance<br>with and<br>adaptation<br>to medical<br>conditions.<br>Pay<br>attention to<br>being<br>present in<br>a non-<br>judgmental<br>manner | Attention<br>regulation,<br>emotion<br>regulation,<br>interpersonal<br>relations,<br>empathy,<br>relapse<br>prevention.<br>Trained in<br>awareness of<br>body<br>movement,<br>behavior,<br>emotions and<br>mental<br>contents | Cultivate<br>interested,<br>accepting,<br>non-<br>judgmental<br>attitude to<br>experience,<br>including<br>difficult<br>sensations,<br>emotions,<br>thoughts<br>and<br>behavior | Cultivation of<br>mindful<br>awareness,<br>loving<br>kindness,<br>enrichment of<br>listening, self-<br>compassion,<br>sensorimotor<br>psychotherapy<br>principles<br>'window of<br>tolerance' | Cultivate<br>interested,<br>accepting,<br>non-<br>judgmental<br>attitude to<br>experience,<br>including<br>difficult<br>sensations,<br>emotions,<br>thoughts<br>and<br>behavior | Cultivate<br>interested,<br>accepting,<br>non-<br>judgmental<br>attitude to<br>experience,<br>including<br>difficult<br>sensations,<br>emotions,<br>thoughts<br>and<br>behavior |
| <b>3. What -<br/>Materials<br/>provided to<br/>participants</b> | Written<br>handout,<br>audio and<br>video aids                                                          | NR                                                                                                                                                                              | Headset,<br>webcam,<br>Audio CDs<br>for home<br>practice                                                                                                                                                                            | NR                                                                                                                                                                              | NR                                                                                                                                                                                                                                  | NR                                                                                                                                                                                                                                  | Leaflets for<br>each<br>session and<br>home<br>practice<br>CDs                                                                                                         | Audio CDs, 25<br>page booklet<br>on sessions<br>and<br>instructions<br>on mindful<br>exercises                                                                                                                                | Course<br>manual,<br>home<br>practice CDs,<br>Book - <i>Full<br/>Catastrophe<br/>Living</i>                                                                                     | NR                                                                                                                                                                                            | Dedicated<br>website<br>with online<br>multimedia<br>for home<br>practices                                                                                                      | NR                                                                                                                                                                              |
| <b>4. What -<br/>Procedures<br/>pre session</b>                 | Had to make<br>a<br>commitment<br>to regular<br>practice                                                | Personal<br>intake<br>interview;<br>goal<br>planning                                                                                                                            | Screened for<br>evidence of<br>distress on<br>GHQ                                                                                                                                                                                   | NR                                                                                                                                                                              | Screened for<br>above<br>average<br>anxiety,                                                                                                                                                                                        | Personal<br>intake<br>interview                                                                                                                                                                                                     | Personal<br>intake<br>interview                                                                                                                                        | NR                                                                                                                                                                                                                            | NR                                                                                                                                                                              | NR                                                                                                                                                                                            | NR                                                                                                                                                                              | Score of at<br>least 10 on<br>PSS                                                                                                                                               |
| <b>4. What -<br/>Procedures –<br/>in session</b>                | <b>General<br/>description<br/>only -</b>                                                               | <b>General<br/>description<br/>only -</b>                                                                                                                                       | <b>Session<br/>content<br/>reported in<br/>paper –</b>                                                                                                                                                                              | <b>Session<br/>content<br/>reported in<br/>paper –</b>                                                                                                                          | <b>Session<br/>content<br/>reported in<br/>paper –</b>                                                                                                                                                                              | <b>Session<br/>outline<br/>reported in<br/>paper –</b>                                                                                                                                                                              | <b>Session<br/>outline<br/>reported in<br/>paper –</b>                                                                                                                 | <b>Session<br/>outline<br/>reported in<br/>paper –</b>                                                                                                                                                                        | <b>Session<br/>content<br/>reported in<br/>paper –</b>                                                                                                                          | <b>General<br/>description in<br/>trial protocol<br/>–</b>                                                                                                                                    | <b>General<br/>description<br/>only -</b>                                                                                                                                       | <b>Session<br/>content<br/>reported in<br/>paper –</b>                                                                                                                          |

|                                               |                                                                         |                                                                                                         |                                                                                                                                  |                                                                                                                                                  |                                                                                                              |                                                                                                          |                                                                                                                                |                                                                                                                                                        |                                                                                   |                                                                                                                                                                                       |                                                 |                                                                                                                                     |
|-----------------------------------------------|-------------------------------------------------------------------------|---------------------------------------------------------------------------------------------------------|----------------------------------------------------------------------------------------------------------------------------------|--------------------------------------------------------------------------------------------------------------------------------------------------|--------------------------------------------------------------------------------------------------------------|----------------------------------------------------------------------------------------------------------|--------------------------------------------------------------------------------------------------------------------------------|--------------------------------------------------------------------------------------------------------------------------------------------------------|-----------------------------------------------------------------------------------|---------------------------------------------------------------------------------------------------------------------------------------------------------------------------------------|-------------------------------------------------|-------------------------------------------------------------------------------------------------------------------------------------|
|                                               | Body awareness, breath awareness, mindful movement, Tui Na self-massage | Observation of sensory, cognitive and affective experience in lying, sitting, and dynamic yoga postures | Raisin exercise, Mindful awareness, body scan, sitting practice, 3-minute breathing space, psycho-education, cognitive exercises | Raisin exercise, body scan, breath awareness, sitting practice, 3-minute breathing, mindful-walking, education on stress, behavioural activation | Raisin exercise, sitting practices, 3-minute breathing, mindful-walking, body awareness, cognitive exercises | Sustained attentional focus on the body and breath, decentered view of thoughts as passing mental events | Body awareness, raisin exercise, 3-minute breathing, yoga, sitting meditation, psycho-education on stress, mountain meditation | Mindful breathing, body scan, loving kindness, compassion, empathy, CBT exposure methods, assertiveness, attention, emotion and behavioural regulation | Raisin exercise, Mindful breathing, body scan, mindful movement, psycho-education | Emphasis on sensorimotor resources: grounding, centring, self-soothing, psycho-education on stress, self-compassion, body scan, breath meditation, walking meditation, yoga exercises | Based on original MBSR protocol                 | Mindful breathing, body scan, mindful movement, loving kindness, sitting meditation, push-pull exercise, psycho-education on stress |
| <b>4. What – Procedures for home practice</b> | 30 minutes daily                                                        | 40 minutes daily                                                                                        | 10-20 minutes daily                                                                                                              | NR                                                                                                                                               | NR                                                                                                           | NR                                                                                                       | NR                                                                                                                             | 15 – 45 minutes daily                                                                                                                                  | 45 minutes daily                                                                  | 45 minutes daily                                                                                                                                                                      | NR                                              | 45 minutes daily                                                                                                                    |
| <b>4. What - Procedures – post course</b>     | NR                                                                      | Post course interviews for all participants                                                             | Post course interviews for some participants                                                                                     | NR                                                                                                                                               | NR                                                                                                           | NR                                                                                                       | NR                                                                                                                             | NR                                                                                                                                                     | Post course interviews for some participants                                      | NR                                                                                                                                                                                    | NR                                              | NR                                                                                                                                  |
| <b>5. Who provided</b>                        | NR                                                                      | Two experienced (>9 years), certified teachers                                                          | Study author. Had completed MBI teacher training                                                                                 | Trained psychologist                                                                                                                             | NR                                                                                                           | NR                                                                                                       | NR                                                                                                                             | Clinical psychologist                                                                                                                                  | Two experienced (7.5 years), certified physician teachers                         | Trained clinical psychologists, used to working with PwMS                                                                                                                             | Expert MBSR trainer                             | Certified MBSR teacher with 16 years experience                                                                                     |
| <b>6. How - Mode of delivery</b>              | One-to-one, face-to-face                                                | Group, face-to-face, 10-15 people per group                                                             | Group, via Skype, max 5 people per group                                                                                         | Group, face-to-face, 20 people per group                                                                                                         | Group, 20 people per group                                                                                   | Group, 12 per group                                                                                      | Group, 12 people per group                                                                                                     | Group, 28 people per group                                                                                                                             | Group, face-to-face, 25 people per group                                          | Group, number per group NR                                                                                                                                                            | Group, via Skype, average of 5 people per group | Group, number per group NR                                                                                                          |
| <b>7. Where - Intervention location</b>       | Unclear                                                                 | Unclear                                                                                                 | Participant's own homes                                                                                                          | Ahvaz MS Society                                                                                                                                 | Unclear                                                                                                      | Unclear                                                                                                  | Unclear                                                                                                                        | Unclear                                                                                                                                                | NHS Centre for Integrative Care                                                   | Unclear                                                                                                                                                                               | In patients own homes                           | NR                                                                                                                                  |
| <b>8. When and how much</b>                   | 6 weekly sessions                                                       | 9 weekly 2.5 hour sessions                                                                              | 8 weekly hour sessions                                                                                                           | 8 weekly 2 hour sessions                                                                                                                         | 8 weekly 2 hour sessions                                                                                     | 8 weekly 2 hour sessions                                                                                 | 8 weekly two hour sessions                                                                                                     | 8 weekly 2 hour sessions                                                                                                                               | 8 weekly 2.5 hour sessions                                                        | 8 weekly 3 hour sessions<br>7hr practice day                                                                                                                                          | 8 weekly sessions (? duration)                  | 8 weekly 2 hour sessions<br>6 hour practice                                                                                         |

|                                           |                                               |                                                                |                                                                                             |    |                                                                |    |    |    |                                                                      |                                                                                |                                                            |                                                                                                                          |
|-------------------------------------------|-----------------------------------------------|----------------------------------------------------------------|---------------------------------------------------------------------------------------------|----|----------------------------------------------------------------|----|----|----|----------------------------------------------------------------------|--------------------------------------------------------------------------------|------------------------------------------------------------|--------------------------------------------------------------------------------------------------------------------------|
|                                           |                                               | 7hr practice day at week 6                                     |                                                                                             |    |                                                                |    |    |    |                                                                      |                                                                                |                                                            | day at week 6                                                                                                            |
| <b>9. Tailoring</b>                       | Individualised application of core techniques | Exercises did not exceed level of function                     | Developed with PwMS. MBCT manual adapted for Progressive MS issues Mindful-movement removed | NR | NR                                                             | NR | NR | NR | Developed with PwMS, informed MBSR optimisation for future iteration | Protocol reports tailoring to needs of participants, but not reported in paper | Music meditations and acceptance of MS symptoms introduced | NR                                                                                                                       |
| <b>10. In study modifications</b>         | NR                                            | NR                                                             | NR                                                                                          | NR | NR                                                             | NR | NR | NR | Mindful movement simplified                                          | NR                                                                             | NR                                                         | NR                                                                                                                       |
| <b>11. How well-Treatment adherence</b>   | Average 32 minutes home practice/day (>100%)  | 92% session attendance; Average 29.2 minutes home practice/day | 18/19 (95%) completed >= 4 sessions, Home practice NR                                       | NR | 88% session attendance                                         | NR | NR | NR | 60% session attendance; Average 32.5 minutes home practice/day       | NR                                                                             | 79% session attendance                                     | 85% attended >= 6/8 sessions; median home practices 38 minutes day (range 14-80 minutes); only 55% practiced as assigned |
| <b>12. How well - Fidelity assessment</b> | NR                                            | NR                                                             | Senior clinical psychologist listened to session recordings for every session               | NR | All sessions recorded and assessed as consistent with protocol | NR | NR | NR | As per NIH guidance (2004) minus session observation/recording       | NR                                                                             | Treatment integrity monitored, but NR how                  | NR                                                                                                                       |

1. NR – Not reported; 2. MBSR – Mindfulness-Based Stress Reduction; 3. MBCT – Mindfulness-Based Cognitive Therapy; 4. PwMS – People with MS; 5. GHQ – General Health Questionnaire; 6. MiCBT – Mindfulness-integrated CBT; 7. PSS – Perceived Stress Scale
